# Supplementary material
Source: JCI journal article supplement (doi:10.1172/jci.insight.205137)
Supplement: sd2 [file 2]

SUPPLEMENTAL FIGURES AND LEGENDS FOR LEE ET AL.

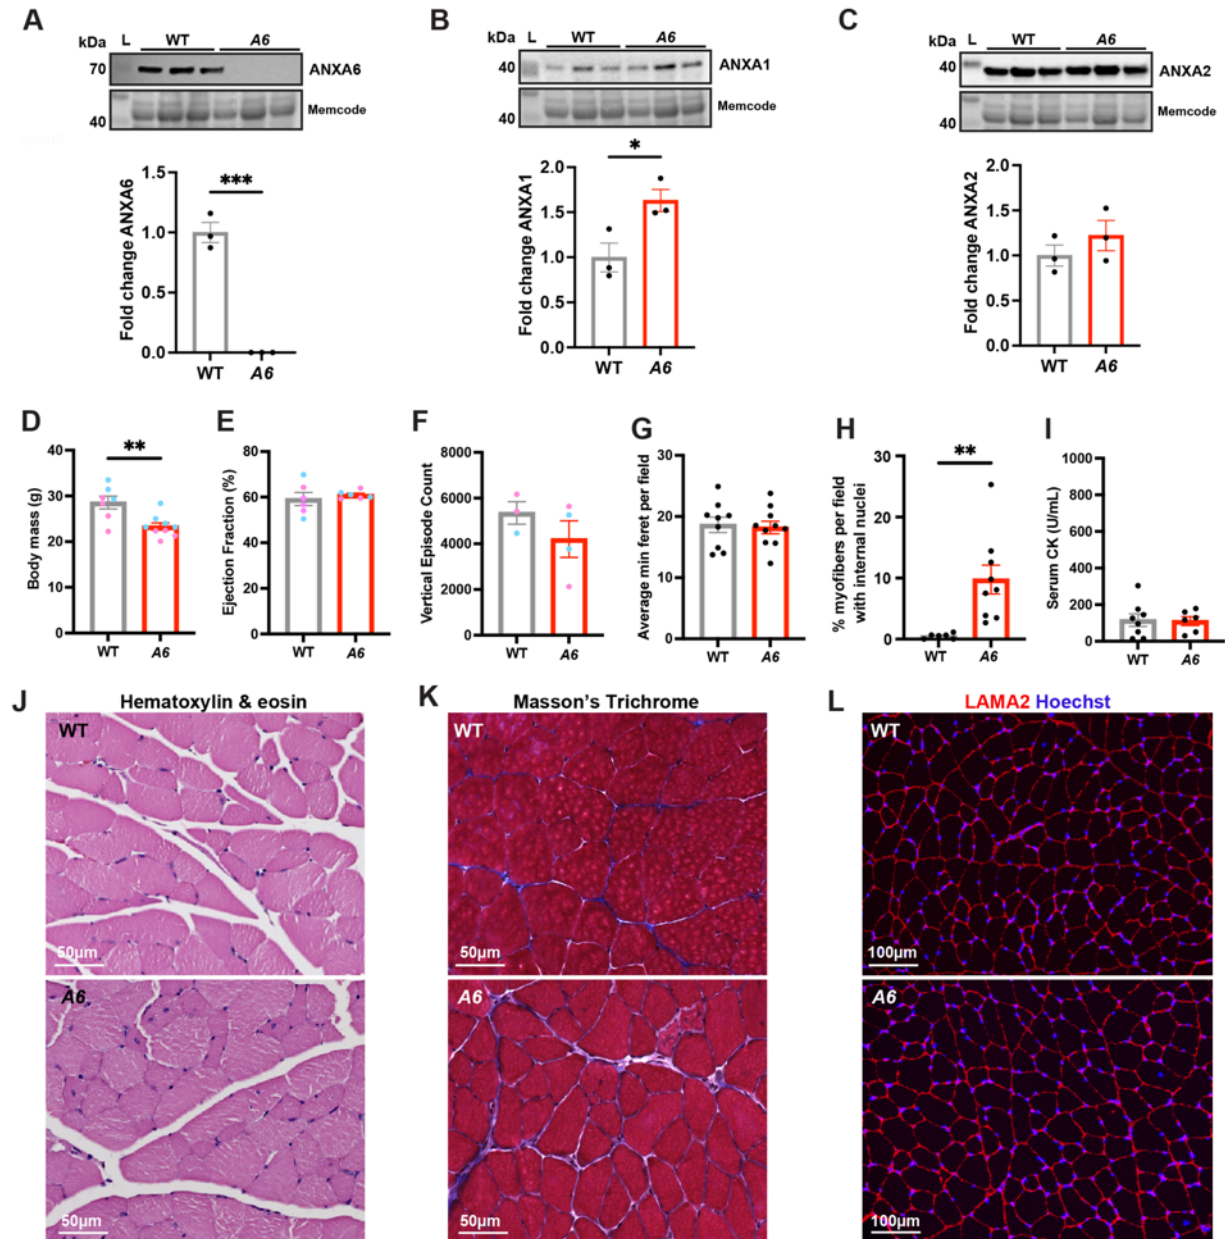

**Supplemental Figure 1. Minimal histopathological changes in *Anxa6*<sup>-/-</sup> (A6) mice.** (A) Immunoblot of WT and A6 muscle lysates confirms loss of ANXA6 protein. (B) Immunoblotting of WT and A6 muscle shows increased ANXA1. (C) Immunoblot for ANXA2 in WT and A6 muscle shows comparable amounts. (D) Reduced total body mass in A6 mice compared to WT controls. (E) Ejection fraction % was similar between A6 and WT mice. (F) Mouse vertical episode activity was similar. Male (blue dots), female (pink dots). n=5-6 mice per genotype. (G) Myofiber size plotted as average minimum feret diameter per field was similar between WT and A6 mice. (H) A6 muscle had a significantly increased percentage of myofibers per field with internal nuclei. (I) Similar serum creatine kinase (CK) between WT and A6 mice. (J) Representative hematoxylin and eosin images of quadriceps muscle from WT and A6 mice. (K) Representative Masson's Trichrome images of quadriceps muscle from WT and A6 mice. (L) LAMA2 staining outlines myofibers. Hoechst marks nuclei. Two-tailed Student's t-test, \*p < 0.05, \*\*p < 0.01.

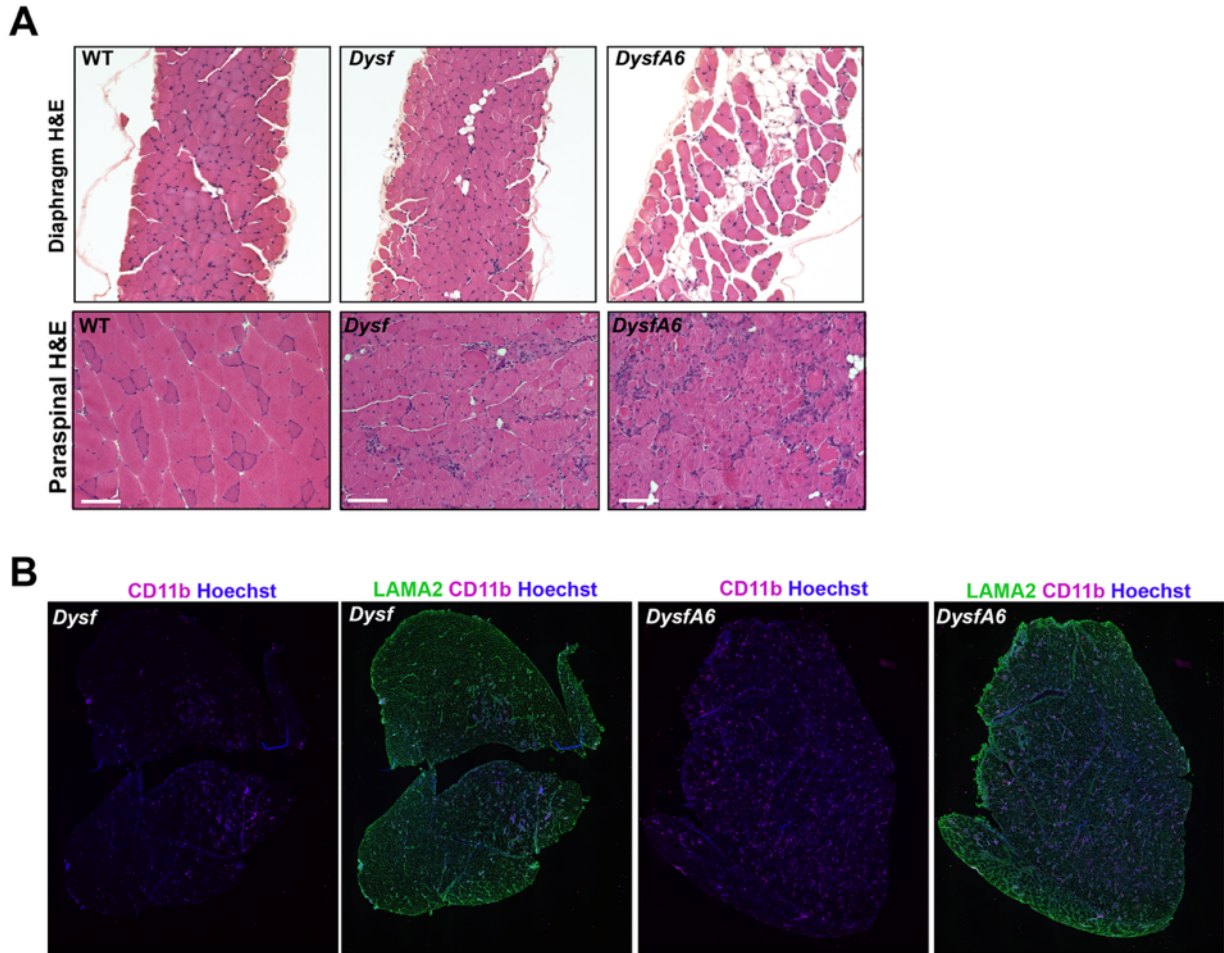

**Supplemental Figure 2. Increased disease pathology across multiple *DysfA6* muscle groups compared to *Dysf* muscle.** (A) Hematoxylin and Eosin staining showed greater fibrofatty and immune infiltrate in *DysfA6* diaphragm and paraspinal spinal muscles compared to *Dysf* muscle. (B) Immunofluorescence imaging of whole quadriceps muscles demonstrating increased CD11b cellular infiltrate throughout the *DysfA6* muscle compared to *Dysf*.

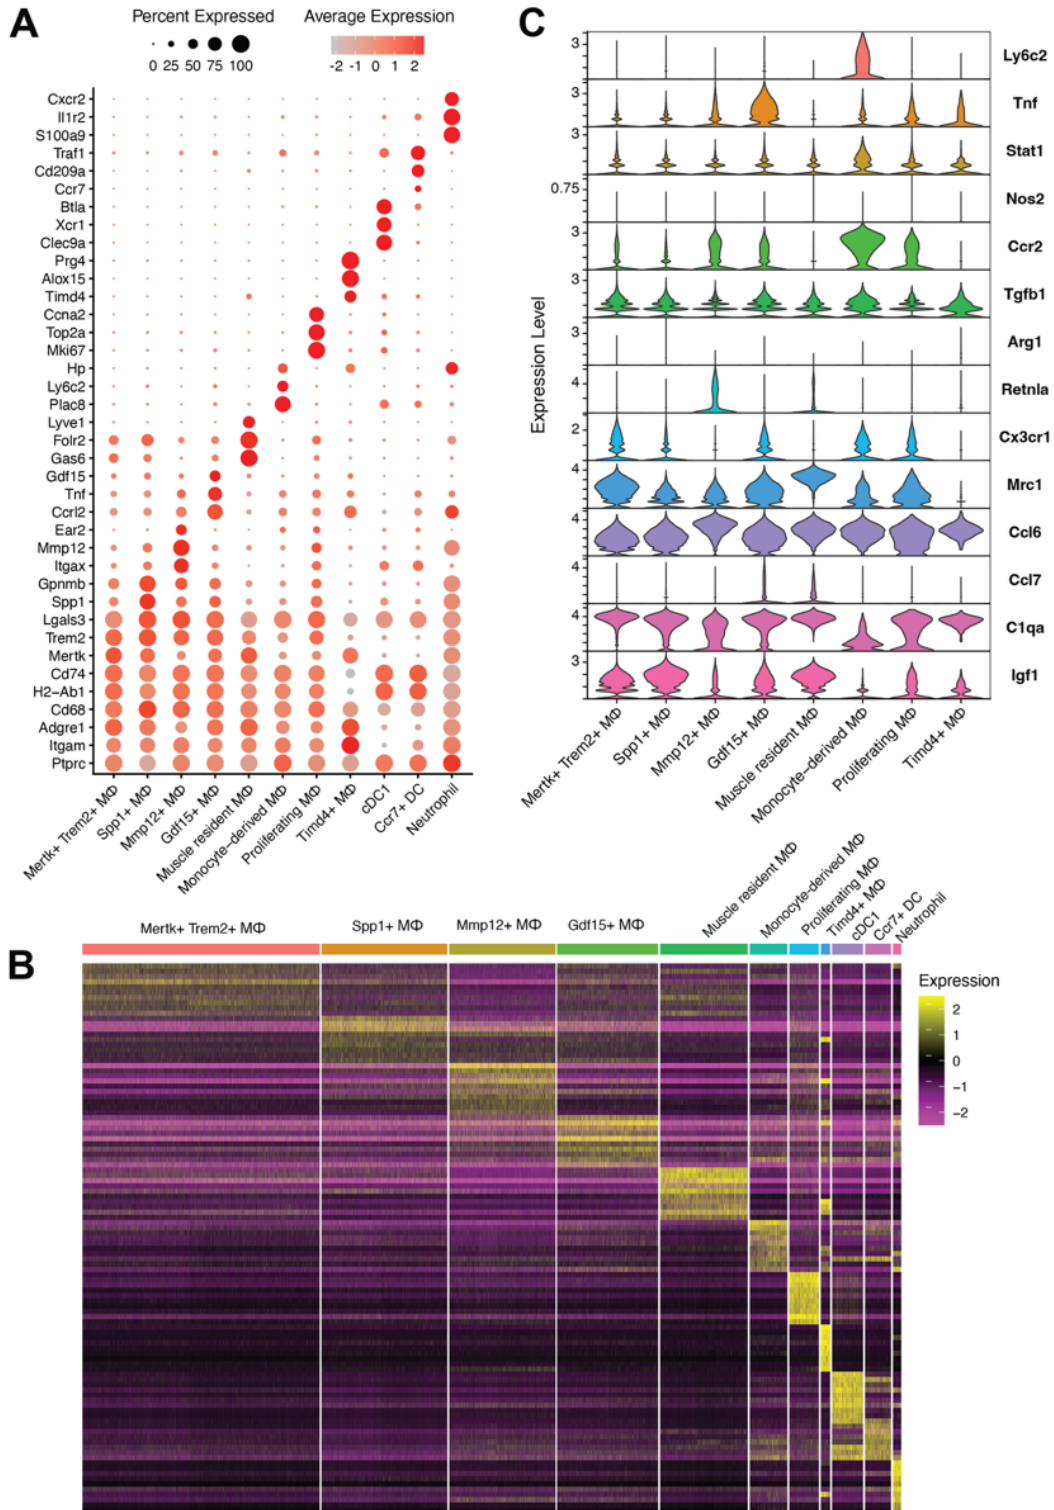

**Supplemental Figure 3. M1 and M2 marker genes distribute across many macrophage subpopulations in *Dysf/DysfA6* skeletal muscle.** (A) Key marker genes used to identify different myeloid cell subpopulations in *Dysf* and *DysfA6* muscle scRNA-seq data. (B) Heatmap of top 10 differentially expressed genes from each myeloid cell types in *Dysf* and *DystA6* scRNA-seq data. (C) Violin plots illustrating canonical M1 and M2 macrophage marker gene expression and broad distribution across macrophage subtypes in *Dysf* and *DysfA6*.

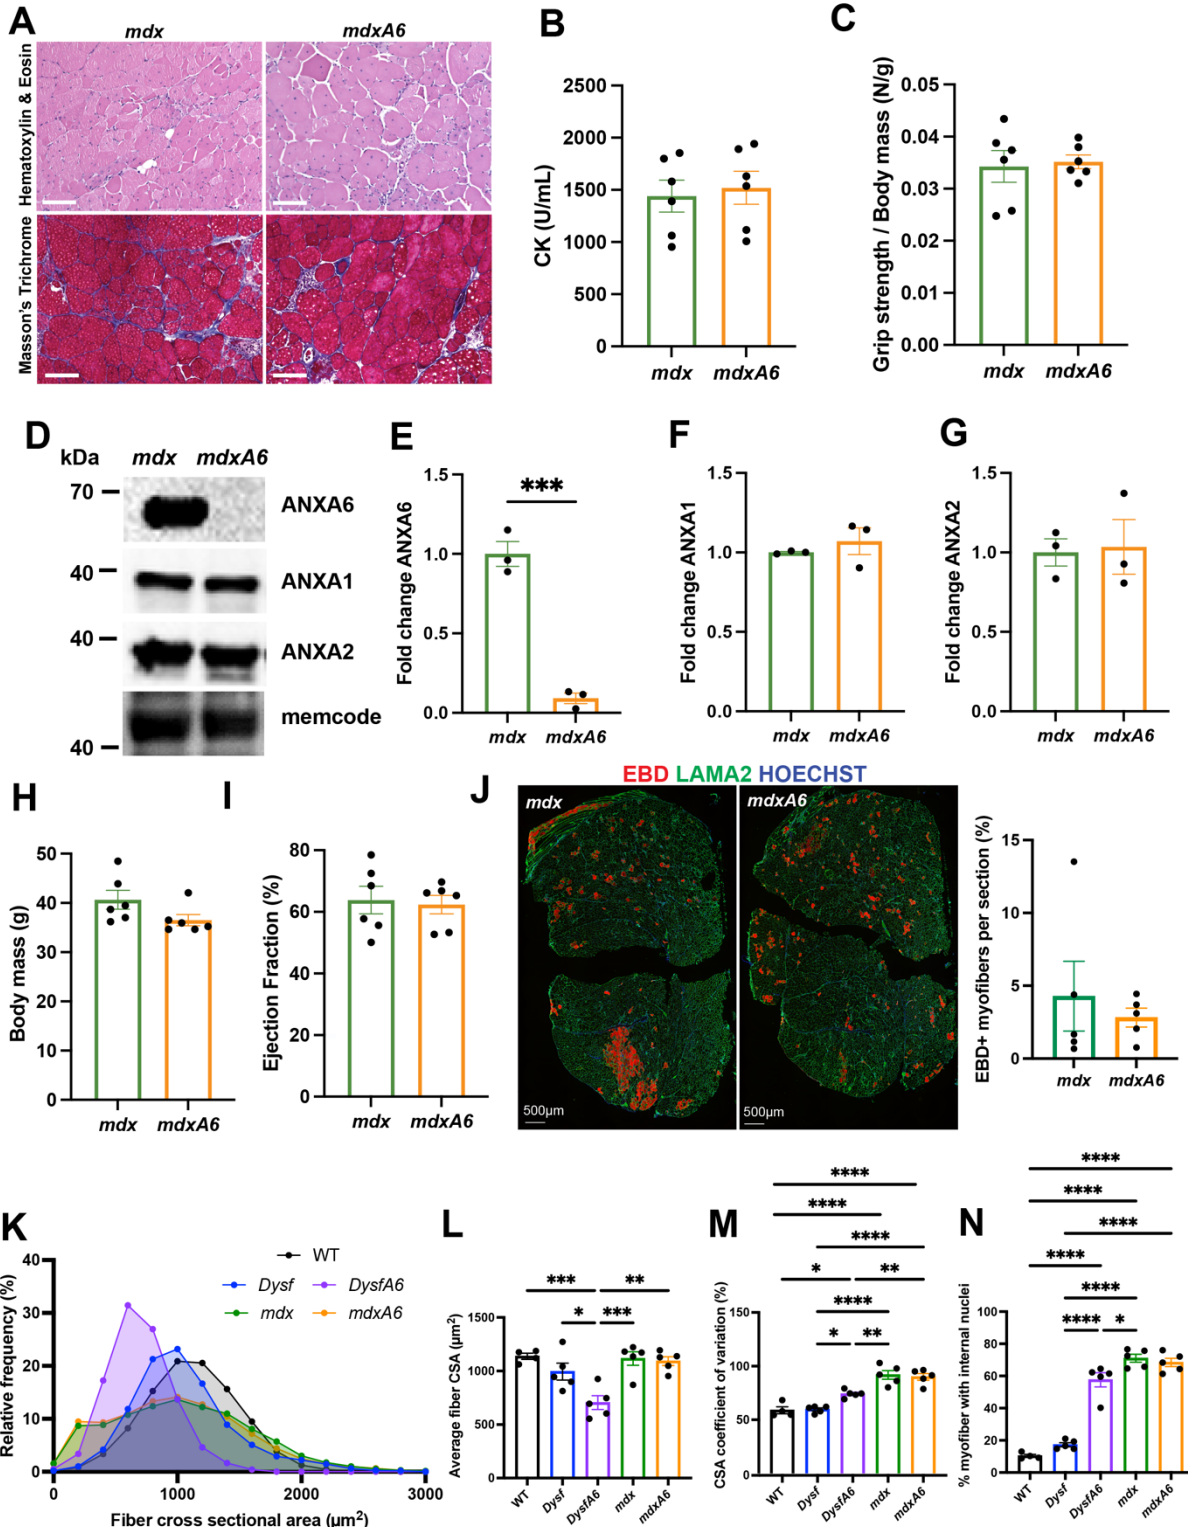

**Supplemental Figure 4. *mdxA6* and *mdx* mice show similar muscle pathology and function.** (A) Representative Hematoxylin & Eosin and Masson's Trichrome images of quadriceps muscle from *mdx* and *mdxA6* mice. (B) Serum creatine kinase (CK) was unchanged between *mdx* and *mdxA6* mice. (C) Normalized forelimb grip strength was similar between *mdx* and *mdxA6* mice (n=6 mice per genotype, all males). (D-G) Immunoblot

quantification of *mdx* and *mdxA6* muscle lysates confirmed loss of ANXA6 protein with no significant change in ANXA1 and ANXA2. **(H and I)** Body mass and cardiac ejection fraction (%) were similar between *mdx* and *mdxA6* mice. **(J)** Immunofluorescence image of full quadriceps muscle cross-section isolated from *mdx* and *mdxA6* mice injected with EBD demonstrated similar number of EBD (red) positive myofibers in both genotypes. LAMA2 (green) outlined the muscle section (n=5 mice per genotype, 2 sections per mouse). **(K)** Relative frequency of myofiber CSA is similar between *mdx* and *mdxA6*, along with **(L)** average CSA, **(M)** CSA variation, and **(N)** percentage of myofibers with internal myonuclei. Two-tailed Student's t-test for comparison between two groups, one-way ANOVA for comparison across 5 groups, \*p<0.05, \*\*p<0.01, \*\*\*p<0.005, \*\*\*\*p<0.001. Scale bar 100µm.

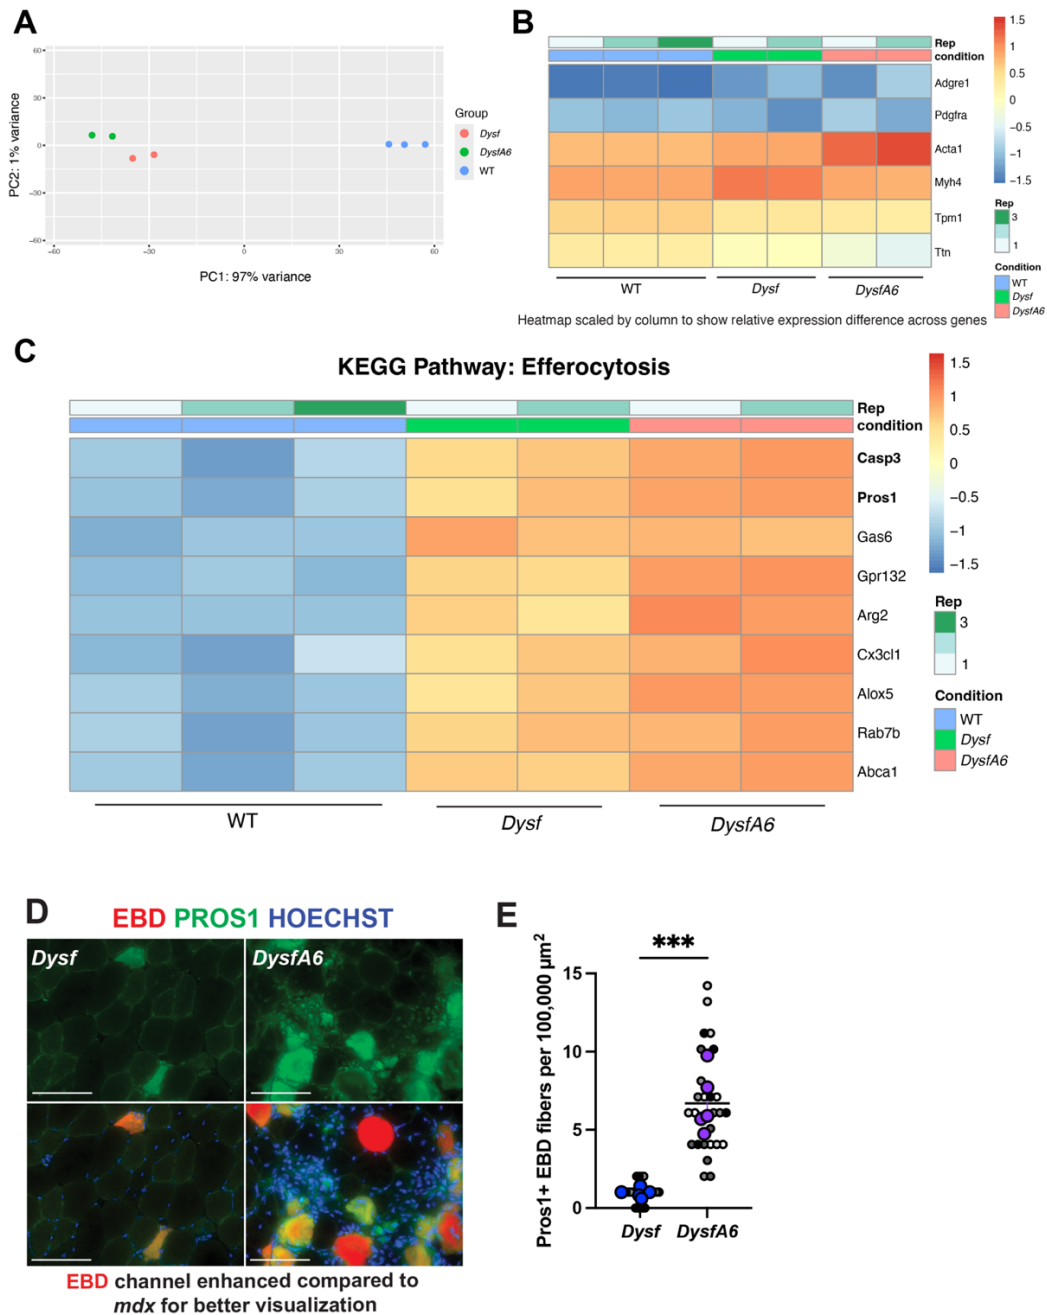

**Supplemental Figure 5. Defective membrane repair increases efferocytosis gene expression in *DysfA6* myofibers.** (A) The myofiber fraction of muscle was isolated and bulk RNA-seq was completed and analyzed. The WT sequence data was from (49). Principal Component Analysis (PCA) demonstrates clustering of samples from each genotype. (B) Higher expression of sarcomeric genes than mononuclear cell markers (*Adgre1* and *Pdgfra*) within each sample confirmed enrichment of myofiber fractions. (C) Heatmap of upregulated efferocytosis genes in WT, *Dysf* and *DysfA6* myofiber fraction showed sequential increase in expression: WT < *Dysf* < *DysfA6*. (D) Representative IFM images of EBD-injected muscle, demonstrated distinct patterns of PROS1 expression in *Dysf* and *DysfA6* muscle EBD (red), PROS1 (green), nuclei (blue). (E) Quantification of PROS1+/EBD+ fibers demonstrated that having more impaired repair leads to more PROS1+/EBD+ fibers. Two-tailed Student's t-test, \*\*\*\* $p < 0.001$ . Scale bar 100 $\mu\text{m}$ .

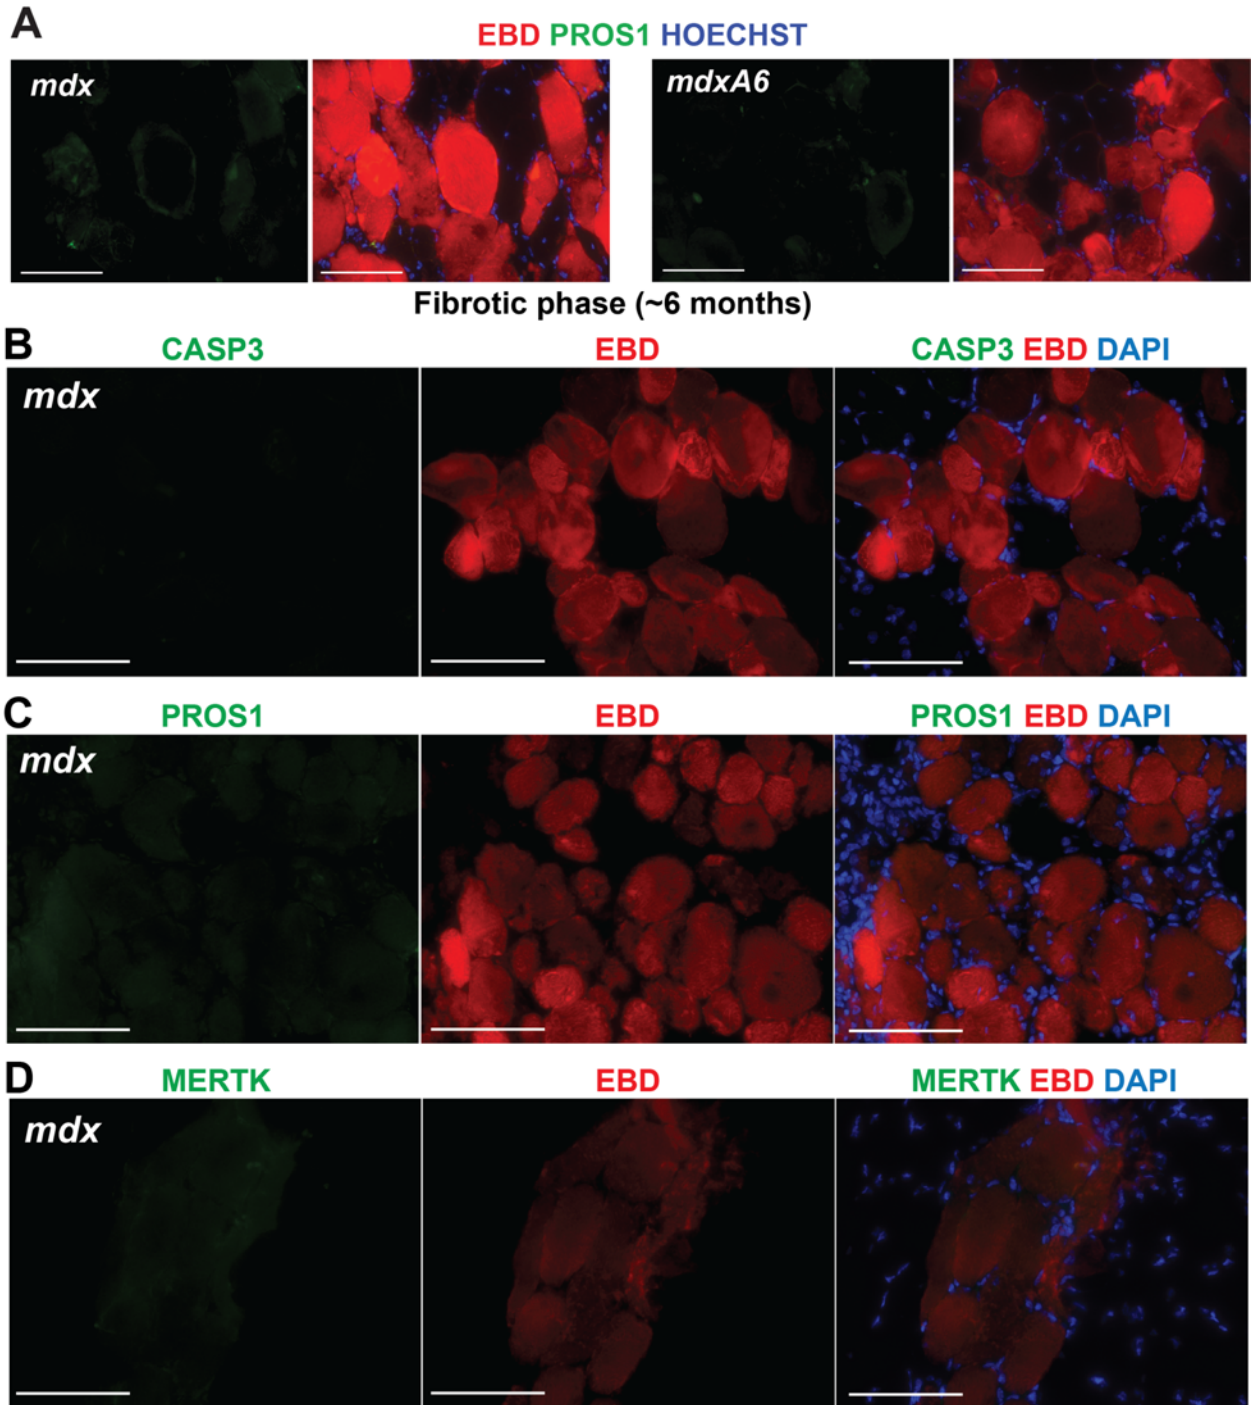

**Supplemental Figure 6. Lower MERTK, CASP3 and PROS1 expression in EBD+ fibers in *mdx* and *mdxA6* muscle compared to *Dysf* and *DysfA6*. (A) Strongly EBD positive (red) myofibers in *mdx* and *mdxA6* muscle were less PROS1 positive at fibrotic phase of 6 months. (B and C) Four-week, highly inflamed *mdx* muscle displayed EBD positive myofibers with low to no CASP3 or PROS1, and MERK expression. Scale bar 100 $\mu$ m.**

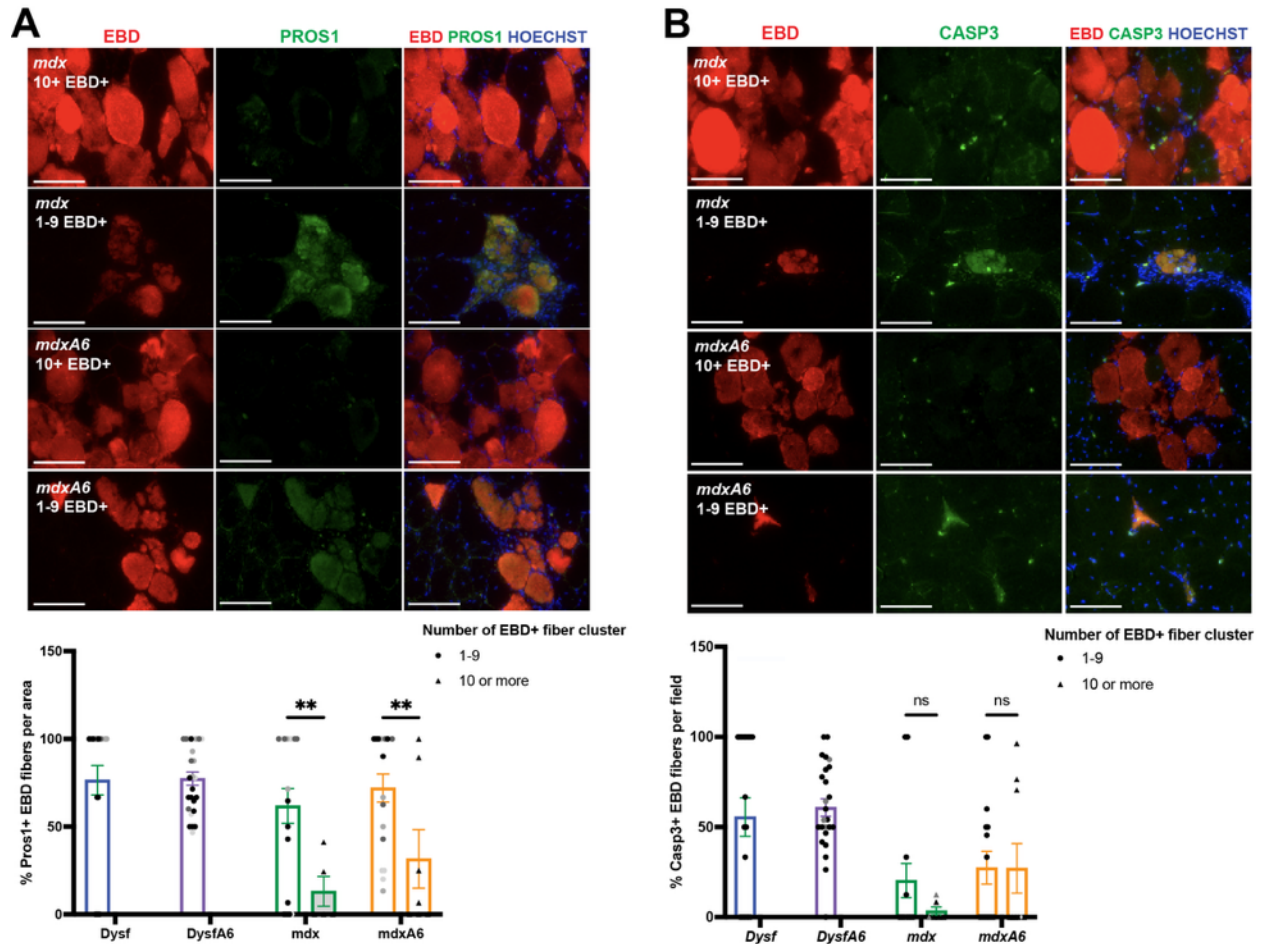

**Supplemental Figure 7. Lack of activation of cleaved caspase-3 and protein S in areas of large lesion in *mdx* and *mdxA6* muscle. (A and B) Areas of large lesions with more than 10 EBD+ myofibers had fewer PROS1+/EBD+ or CASP3+/EBD+ myofibers in both *mdx* and *mdxA6*. Large EBD+ clusters were not seen in *Dysf* and *DysfA6* muscles; all EBD+ fibers were in clusters of 1-9 EBD+ fibers per clusters (n=5 mouse per genotype with 2 sections per mouse males only). Two-way ANOVA, \*\*p<0.01. Scale bar 100µm.**

**Supplemental Table 1. Antibodies used in this study.**

| <b>Antibody</b>                       | <b>Source</b>            | <b>Catalog #</b> | <b>Dilution</b> |
|---------------------------------------|--------------------------|------------------|-----------------|
| Annexin A1                            | Thermo Fisher Scientific | PA5-22266        | 1:100           |
| Annexin A2                            | BD Bioscience            | 610068           | 1:100           |
| Annexin A6                            | Abcam                    | ab199422         | 1:100           |
| Laminin-2                             | Sigma-Aldrich            | L0663            | 1:100           |
| PDGFRa                                | R&D Systems              | AF1062           | 1:40            |
| CD11b                                 | Thermo Fisher Scientific | 17-0112-82       | 1:100           |
| CD11b                                 | Thermo Fisher Scientific | 14-0112-82       | 1:100           |
| PROS1                                 | Novus Bio                | NB431506         | 1:100           |
| Cleaved caspase-3<br>(CASP3)          | Cell Signaling           | 9661T            | 1:100           |
| MERTK                                 | Thermo Fisher Scientific | 14-5751-81       | 1:100           |
| MERTK                                 | R&D systems              | AF591-SP         | 1:100           |
| F4/80                                 | Abcam                    | ab6640           | 1:100           |
| Alexa Fluor 647 donkey<br>anti-rat    | Thermo Fisher Scientific | A78947           | 1:2500          |
| Alexa Fluor 594 donkey<br>anti-rat    | Thermo Fisher Scientific | A11007           | 1:2500          |
| Alexa Fluor 488 donkey<br>anti-rat    | Thermo Fisher Scientific | A11006           | 1:2500          |
| Alexa Fluor 488 donkey<br>anti-rabbit | Thermo Fisher Scientific | A11008           | 1:2500          |
| Alexa Fluor 647 donkey<br>anti-rabbit | Thermo Fisher Scientific | A31573           | 1:2500          |
| Alexa Fluor 594 donkey<br>anti-rabbit | Thermo Fisher Scientific | A11012           | 1:2500          |
| Alexa Fluor 594 donkey<br>anti-goat   | Thermo Fisher Scientific | A11058           | 1:2500          |
| Hoechst 33342                         | Thermo Fisher Scientific | H3570            | 1:25,000        |
| Goat anti-Rat IgG HRP                 | Thermo Fisher Scientific | 31470            | 1:2500          |
| Goat anti-rabbit IgG HRP              | Thermo Fisher Scientific | NC9734651        | 1:2500          |
| Donkey anti-Goat IgG<br>HRP           | Thermo Fisher Scientific | A15999           | 1:2500          |
